# Supplementary material for: Lost microbes of COVID-19: Bifidobacterium, Faecalibacterium depletion and decreased microbiome diversity associated with SARS-CoV-2 infection severity
Source: PubMed Central journal article supplement — BMJ Open Gastroenterol. 2022 Apr 28;9(1):e000871. doi: 10.1136/bmjgast-2022-000871 (PMC9051551; doi:10.1136/bmjgast-2022-000871), 2022-04-28
Supplement: bmjgast-2022-000871supp001.pdf [file bmjgast-2022-000871supp001.pdf]

**Supplementary Table S1.** Demographic and SARS-CoV-2 overall clinical characteristics of SARS-CoV-2-positive patients along with SARS-CoV-2-negative exposed controls and their exposure relation to SARS-CoV-2 positive individual.

| <b>No.</b> | <b>Age</b> | <b>Sex</b> | <b>Ethnicity</b> | <b>State<br/>of USA</b> | <b>Risk Factors</b>                                                  | <b>BMI<br/>*</b> | <b>PCR<br/>Result</b> | <b>Severity</b> |
|------------|------------|------------|------------------|-------------------------|----------------------------------------------------------------------|------------------|-----------------------|-----------------|
| <b>1</b>   | 21         | F          | NHW              | PA                      | none                                                                 | 24.8             | positive              | severe          |
| <b>2</b>   | 71         | M          | H                | CA                      | none                                                                 | 18.4             | positive              | severe          |
| <b>3</b>   | 86         | M          | NHW              | CA                      | Alzheimer's                                                          | 21.1             | positive              | severe          |
| <b>4</b>   | 18         | F          | NHW              | AZ                      | none                                                                 | 22.0             | positive              | severe          |
| <b>5</b>   | 31         | M          | NHW              | CO                      | overweight                                                           | 26.9             | positive              | severe          |
| <b>6</b>   | 43         | F          | NHW              | TX                      | overweight                                                           | 25.8             | positive              | severe          |
| <b>7</b>   | 70         | F          | NHW              | LA                      | overweight                                                           | 25.8             | positive              | severe          |
| <b>8</b>   | 56         | M          | NHW              | CA                      | overweight                                                           | 27.3             | positive              | severe          |
| <b>9</b>   | 44         | F          | NHW              | GA                      | overweight                                                           | 27.8             | positive              | severe          |
| <b>10</b>  | 53         | M          | NHW              | GA                      | obesity                                                              | 30.7             | positive              | severe          |
| <b>11</b>  | 37         | M          | NHW              | FL                      | hypertension                                                         | 23.8             | positive              | severe          |
| <b>12</b>  | 60         | M          | NHW              | CO                      | none                                                                 | 22.7             | positive              | severe          |
| <b>13</b>  | 69         | F          | NHW              | CO                      | hypertension                                                         | 22.9             | positive              | severe          |
| <b>14</b>  | 55         | M          | NHW              | NY                      | obesity, HIV                                                         | 37.2             | positive              | severe          |
| <b>15</b>  | 67         | F          | NHW              | IL                      | hypertension,<br>diabetes mellitus,<br>obesity, cerebral<br>aneurysm | 48.5             | positive              | severe          |

|           |    |   |     |    |                                                |      |          |          |
|-----------|----|---|-----|----|------------------------------------------------|------|----------|----------|
| <b>16</b> | 66 | M | NHW | IL | hypertension,<br>obesity, pulmonary<br>embolus | 33.2 | positive | severe   |
| <b>17</b> | 49 | F | NHW | AL | overweight                                     | 27.4 | positive | severe   |
| <b>18</b> | 60 | M | NHW | CA | hypertension,<br>overweight                    | 26.2 | positive | severe   |
| <b>19</b> | 63 | F | NHW | GA | hypertension,<br>overweight                    | 28.1 | positive | severe   |
| <b>20</b> | 59 | F | NHW | GA | hypertension                                   | NA   | positive | severe   |
| <b>21</b> | 53 | F | NHW | CA | none                                           | 24.5 | positive | severe   |
| <b>22</b> | 36 | M | NHW | OR | obesity                                        | 30.7 | positive | severe   |
| <b>23</b> | 10 | M | NHW | HI | none                                           | 14.5 | positive | severe   |
| <b>24</b> | 52 | M | NHW | HI | none                                           | 24.1 | positive | severe   |
| <b>25</b> | 55 | F | NHW | HI | hypertension,<br>overweight                    | 25.0 | positive | severe   |
| <b>26</b> | 61 | F | NHW | WA | none                                           | 23.8 | positive | severe   |
| <b>27</b> | 72 | F | NHW | CA | none                                           | 19.5 | positive | severe   |
| <b>28</b> | 62 | M | NHW | TN | obesity,<br>hypertension                       | 31.5 | positive | severe   |
| <b>29</b> | 23 | F | NHW | CA | obesity                                        | 30.9 | positive | moderate |
| <b>30</b> | 25 | F | NHW | CA | Obesity, asthma                                | 30.6 | positive | moderate |

|           |    |   |     |    |                                 |      |          |          |
|-----------|----|---|-----|----|---------------------------------|------|----------|----------|
| <b>31</b> | 24 | F | NHW | AZ | asthma                          | NA   | positive | moderate |
| <b>32</b> | 36 | F | H   | AZ | hypertension,<br>overweight     | 25.4 | positive | moderate |
| <b>33</b> | 33 | M | H   | CA | none                            | 18.4 | positive | moderate |
| <b>34</b> | 63 | F | H   | CA | overweight                      | NA   | positive | moderate |
| <b>35</b> | 65 | M | NHW | TX | COPD                            | NA   | positive | moderate |
| <b>36</b> | 75 | M | NHW | CA | hypertension,<br>severe obesity | 48.5 | positive | moderate |
| <b>37</b> | 67 | M | NHW | CA | obesity                         | 33.1 | positive | moderate |
| <b>38</b> | 70 | M | NHW | GA | obesity                         | 30.7 | positive | moderate |
| <b>39</b> | 57 | F | NHW | TX | obesity                         | 32.0 | positive | moderate |
| <b>40</b> | 69 | F | NHW | NE | hypertension                    | 20.9 | positive | moderate |
| <b>41</b> | 19 | M | NHW | GA | none                            | 23.5 | positive | mild     |
| <b>42</b> | 36 | F | NHW | NY | none                            | 18.6 | positive | mild     |
| <b>43</b> | 35 | F | NHW | CA | overweight                      | 28.5 | positive | mild     |

|           |    |   |     |    |                                                                  |      |          |              |
|-----------|----|---|-----|----|------------------------------------------------------------------|------|----------|--------------|
| <b>44</b> | 53 | M | NHW | NE | overweight                                                       | 29.0 | positive | mild         |
| <b>45</b> | 38 | F | NA  | TN | obesity                                                          | 31.3 | positive | mild         |
| <b>46</b> | 45 | F | NHW | PA | hypertension                                                     | 23.0 | positive | mild         |
| <b>47</b> | 22 | M | NHW | GA | overweight                                                       | 25.8 | positive | asymptomatic |
| <b>48</b> | 48 | F | H   | CA | none                                                             | 20.4 | positive | asymptomatic |
| <b>49</b> | 67 | M | NHW | WI | overweight                                                       | 28.5 | positive | asymptomatic |
| <b>50</b> | 53 | M | NHW | IL | obesity, diabetes                                                | 35.3 | positive | asymptomatic |
| <b>51</b> | 67 | F | NHW | WI | overweight,<br>` husband                                         | 26.6 | negative | exposed      |
| <b>52</b> | 58 | F | H   | PA | obesity, + daughter                                              | 30.0 | negative | exposed      |
| <b>53</b> | 51 | F | NHW | CA | hypertension,<br>prediabetes, + son,<br>+ husband, +<br>daughter | 25.0 | negative | exposed      |
| <b>54</b> | 63 | M | NHW | CA | overweight, +<br>mother                                          | 26.4 | negative | exposed      |
| <b>55</b> | 29 | M | NHW | CA | overweight,<br>+ brother                                         | 26.4 | negative | exposed      |

|           |    |   |     |    |                                                            |      |          |         |
|-----------|----|---|-----|----|------------------------------------------------------------|------|----------|---------|
| <b>56</b> | 23 | F | NHW | CA | overweight,<br>+ brother                                   | 26.4 | negative | exposed |
| <b>57</b> | 62 | F | NHW | CA | none, (kissed)<br>+ boyfriend                              | 17.4 | negative | exposed |
| <b>58</b> | 51 | F | NHW | CA | none, + son,<br>+ husband<br>+ daughter                    | 19.9 | negative | exposed |
| <b>59</b> | 16 | F | NHW | CA | none, + mom                                                | 21.2 | negative | exposed |
| <b>60</b> | 26 | M | B   | CA | none, + patients                                           | 19.5 | negative | exposed |
| <b>61</b> | 56 | F | NHW | CA | none, + patient<br>samples                                 | 25.5 | negative | exposed |
| <b>62</b> | 53 | F | NHW | CA | none, + workers, +<br>patients, + patient<br>samples       | 24.0 | negative | exposed |
| <b>63</b> | 35 | M | NHW | KS | none, + wife                                               | 23.7 | negative | exposed |
| <b>64</b> | 35 | M | NHW | CA | none, + roommate                                           | 21.7 | negative | exposed |
| <b>65</b> | 64 | F | H   | TN | prediabetic,<br>overweight,<br>+ physician,<br>+ daughter, | 26.0 | negative | exposed |

|                             |    |   |     |    |                     |      |          |         |  |
|-----------------------------|----|---|-----|----|---------------------|------|----------|---------|--|
| + son-in-law                |    |   |     |    |                     |      |          |         |  |
| <b>66</b>                   | 43 | F | NHW | CA | overweight,         | 26.6 | negative | exposed |  |
| + patient samples           |    |   |     |    |                     |      |          |         |  |
| <b>67</b>                   | 45 | F | NHW | CA | obesity, + patients | 35.1 | negative | exposed |  |
| <b>68</b>                   | 44 | M | NHW | CA | overweight, +       | 27.2 | negative | exposed |  |
| patients, + patient samples |    |   |     |    |                     |      |          |         |  |
| <b>69</b>                   | 52 | M | NHW | CA | overweight,         | 27.1 | negative | exposed |  |
| + patients                  |    |   |     |    |                     |      |          |         |  |
| <b>70</b>                   | 15 | F | NHW | AZ | overweight, +       | 27.1 | negative | exposed |  |
| brother                     |    |   |     |    |                     |      |          |         |  |

\*BMI, body mass index; <sup>+</sup> NHW = non-Hispanic White, H = Hispanic, B=Black, NA = Native

American
