# Supplementary material for: Lost microbes of COVID-19: Bifidobacterium, Faecalibacterium depletion and decreased microbiome diversity associated with SARS-CoV-2 infection severity
Source: PubMed Central journal article supplement — BMJ Open Gastroenterol. 2022 Apr 28;9(1):e000871. doi: 10.1136/bmjgast-2022-000871 (PMC9051551; doi:10.1136/bmjgast-2022-000871), 2022-04-28
Supplement: bmjgast-2022-000871supp002.pdf [file bmjgast-2022-000871supp002.pdf]

**Supplementary Table S2:** Detailed SARS-CoV-2 clinical characteristics and typical dietary habits of subjects.

| No. | Severity | GI Symptoms              | Loss of appetite? | SARS-CoV-2 Symptoms                                                                              | Diet                   |
|-----|----------|--------------------------|-------------------|--------------------------------------------------------------------------------------------------|------------------------|
| 1   | severe   | None                     | N                 | Fever, cough , hypoxemia 88%, anosmia                                                            | Omnivore               |
| 2   | severe   | None                     | Y                 | Fever, cough, hypoxemia of 92%, anosmia, anorexia                                                | Mexican diet, omnivore |
| 3   | severe   | None                     | N                 | Fever, cough, hypoxemia of 88%, anosmia                                                          | Omnivore               |
| 4   | severe   | None                     | N                 | Fever, Tourette's-like symptoms, anosmia                                                         | Omnivore               |
| 5   | severe   | Diarrhea                 | N                 | Fever, cough, no anorexia, anosmia, hematochezia, dizziness, hypoxemia 92%                       | Omnivore               |
| 6   | severe   | None                     | N                 | Fever, cough, anosmia, hypoxemia 91%                                                             | Omnivore               |
| 7   | severe   | None                     | N                 | Fever, cough, anosmia                                                                            | Omnivore               |
| 8   | severe   | Diarrhea, abdominal pain | N                 | Pain while eating, dehydration, fever, anosmia, cough, short of breath, hypoxemia 88%            | Omnivore               |
| 9   | severe   | None                     | N                 | Fever, cough, short of breath, anosmia, dizziness, anosmia, hypoxemia 89%, neurological symptoms | Omnivore               |
| 10  | severe   | None                     | N                 | Fever, cough, hypoxemia 88%, anosmia                                                             | Omnivore               |

|           |        |           |   |                                                                              |          |
|-----------|--------|-----------|---|------------------------------------------------------------------------------|----------|
| <b>11</b> | severe | Diarrhea  | N | Fever, headache, chills, body pain                                           | Omnivore |
| <b>12</b> | severe | Heartburn | N | Fever, cough, short of breath, hypoxemia 88%, Anosmia                        | Omnivore |
| <b>13</b> | severe | Heartburn | N | Fever, cough, hypoxemia 88%, anosmia, full body rash                         | Omnivore |
| <b>14</b> | severe | None      | Y | Fever, chills, chest pain, short of breath, hypoxemia 94%, anorexia, anosmia | Omnivore |
| <b>15</b> | severe | None      | N | Cough, fever, short of breath, hypoxemia 88%, rash                           | Omnivore |
| <b>16</b> | severe | None      | N | Cough, fever, short of breath, hypoxemia 88%                                 | Omnivore |
| <b>17</b> | severe | None      | N | Fever, cough, hypoxemia of 89-90%, anosmia                                   | Omnivore |
| <b>18</b> | severe | None      | N | Fever, cough, hypoxemia 88%, anosmia                                         | Omnivore |
| <b>19</b> | severe | None      | N | Fever, cough, hypoxemia 88%, anosmia, chest pain                             | Omnivore |
| <b>20</b> | severe | Diarrhea  | N | Fever, cough, hypoxemia 88%, anosmia                                         | Omnivore |
| <b>21</b> | severe | None      | N | Fever, cough, anosmia, oxygen saturation not recorded, short of breath       | Omnivore |
| <b>22</b> | severe | None      | N | Fever, cough, anosmia, short of breath                                       | Omnivore |
| <b>23</b> | severe | None      | N | Anosmia, high fever, cough, short of breath, hypoxemia 93%                   | Omnivore |
| <b>24</b> | severe | None      | N | Anosmia, high fever, cough, short of                                         | Omnivore |

|           |          |          |   |                                                                                                            |                        |
|-----------|----------|----------|---|------------------------------------------------------------------------------------------------------------|------------------------|
|           |          |          |   | breath, hypoxemia 90%                                                                                      |                        |
| <b>25</b> | severe   | None     | N | Anosmia, high fever, cough, short of breath, hypoxemia 90%                                                 | Omnivore               |
| <b>26</b> | severe   | None     | N | Cough, anosmia, short of breath, headache, sinus issues, oxygen saturation not recorded                    | Omnivore               |
| <b>27</b> | severe   | None     | N | Anosmia, high fever, cough, short of breath, hypoxemia 92%-93%                                             | Omnivore               |
| <b>28</b> | Severe   | None     | N | Anorexia, anosmia, cough, fever, short of breath, dizziness, sore throat, fatigue, hypoxemia 91%           | Omnivore               |
| <b>29</b> | moderate | Diarrhea | N | Cough, fever, short of breath, oxygen saturation 98%, went to ER not admitted                              | Omnivore               |
| <b>30</b> | moderate |          | N | Cough, anosmia, oxygen saturation 100%, fever                                                              | Omnivore               |
| <b>31</b> | moderate | Diarrhea | N | Cold symptoms, sinusitis, rhinorrhea, fever, cough, anosmia, stable oxygen saturation                      | Omnivore               |
| <b>32</b> | moderate | None     | N | Chest pain, fever, severe headaches/migraines, body aches, chest pressure, anosmia, oxygen saturation 100% | Mexican diet, omnivore |
| <b>33</b> | moderate | Nausea   | N | Rhinorrhea, congestion, body ache, fever                                                                   | Mexican diet,          |

|           |          |                   |   |                                                                                 |          |
|-----------|----------|-------------------|---|---------------------------------------------------------------------------------|----------|
|           |          |                   |   | of 101°, anosmia, oxygen saturation 99%                                         | omnivore |
| <b>34</b> | moderate | None              | N | Anosmia, anorexia, fatigue, cough,<br>oxygen saturation 98%                     | Omnivore |
| <b>35</b> | moderate | Abdominal<br>pain | N | Chest tightness, headache, head<br>congestion, cough, oxygen saturation<br>100% | Omnivore |
| <b>36</b> | moderate | None              | N | Sluggish, cough, nasal congestion,<br>oxygen saturation 98%                     | Omnivore |
| <b>37</b> | moderate | None              | N | Myalgia, backache, oxygen saturation<br>99%                                     | Omnivore |
| <b>38</b> | moderate | None              | N | Fever, cough, anosmia, oxygen<br>saturation 95%                                 | Omnivore |
| <b>39</b> | moderate | None              | N | rhinorrhea, anosmia, mild cough oxygen<br>saturation 98%                        | Omnivore |
| <b>40</b> | moderate | None              | N | Cough, headache, oxygen saturation 96%                                          | Omnivore |
| <b>41</b> | mild     | None              | N | Nasal congestion, oxygen saturation<br>100%                                     | Omnivore |
| <b>42</b> | mild     | Bloating          | N | Fever, cough, anosmia, rhinorrhea,<br>oxygen saturation 100%                    | Omnivore |
| <b>43</b> | mild     | None              | N | Congestion, sinusitis, anosmia, oxygen<br>saturation 100%                       | Omnivore |
| <b>44</b> | mild     | None              | N | Fatigue, short of breath, anosmia, oxygen<br>saturation 100%                    | Omnivore |

|           |              |      |   |                                                                         |                         |
|-----------|--------------|------|---|-------------------------------------------------------------------------|-------------------------|
| <b>45</b> | mild         | None | N | Cough, fatigue, dizziness, sore throat, myalgia, oxygen saturation 100% | Omnivore                |
| <b>46</b> | mild         | None | N | Cough, head congestion, oxygen saturation 98%                           | Omnivore                |
| <b>47</b> | asymptomatic | None | N | None                                                                    | Omnivore                |
| <b>48</b> | asymptomatic | None | N | None                                                                    | Mexican diet, omnivore  |
| <b>49</b> | asymptomatic | None | N | None                                                                    | Omnivore                |
| <b>50</b> | asymptomatic | None | N | None                                                                    | Armenian diet, omnivore |
| <b>51</b> | Ctrl         | None | N | None                                                                    | Omnivore                |
| <b>52</b> | Ctrl         | None | N | None                                                                    | Omnivore                |
| <b>53</b> | Ctrl         | None | N | None                                                                    | Omnivore                |
| <b>54</b> | Ctrl         | None | N | None                                                                    | Kosher, omnivore        |
| <b>55</b> | Ctrl         | None | N | None                                                                    | Kosher, omnivore        |
| <b>56</b> | Ctrl         | None | N | None                                                                    | Kosher, omnivore        |
| <b>57</b> | Ctrl         | None | N | None                                                                    | Omnivore                |
| <b>58</b> | Ctrl         | None | N | None                                                                    | Kosher, omnivore        |
| <b>59</b> | Ctrl         | None | N | None                                                                    | Kosher,                 |

---

|           |      |      |   |      |                     |
|-----------|------|------|---|------|---------------------|
|           |      |      |   |      | omnivore            |
| <b>60</b> | Ctrl | None | N | None | Omnivore            |
| <b>61</b> | Ctrl | None | N | None | Omnivore            |
| <b>62</b> | Ctrl | None | N | None | Omnivore            |
| <b>63</b> | Ctrl | None | N | None | Omnivore            |
| <b>64</b> | Ctrl | None | N | None | Omnivore            |
| <b>65</b> | Ctrl | None | N | None | Omnivore            |
| <b>66</b> | Ctrl | None | N | None | Omnivore            |
| <b>67</b> | Ctrl | None | N | None | Omnivore            |
| <b>68</b> | Ctrl | None | N | None | Omnivore            |
| <b>69</b> | Ctrl | None | N | None | Kosher,<br>omnivore |
| <b>70</b> | Ctrl | None | N | None | Not available       |

---
